# Supplementary material
Source: PubMed Central journal article supplement (PMC10497382)
Supplement: BLT-21-378_Online_Supplementary_Content.pdf [file BLT-21-378_Online_Supplementary_Content.pdf]

**ONLINE SUPPLEMENTARY CONTENT**

**Table SI - MX3 Primer**

| Mix | Antigen    | Forward primer    | 5' - 3'                   | reverse primer  | 5' - 3'                     | size (bp) |
|-----|------------|-------------------|---------------------------|-----------------|-----------------------------|-----------|
| 1   | d          | RH-ubox-MM-f7     | GCCAACAAAACCATTTTTCTGCTAC | RH-dbox-r7      | CCTTTTTCTCTTTCTGGCCTTAACATC | 1727      |
|     | M          | GYPA-M-72T-f1     | CAGCATCAAGTACCACTGGT      | GYPA-i2-r3      | CAGCATCAAGTACCACTGGT        | 752       |
|     | k          | KEL-x5-f6         | TCTGGGGAGGAGAAAGCCTT      | KEL2-578C-r2    | CTCATCAGAAGTCTCAGCG         | 500       |
|     | JK1        | JK1-838G-f1       | GTCTTTAGCCCATTTGcGG       | JK-i9-r1        | CTTTTTCTATCTCCCAACATCC      | 398       |
|     | D exon1    | RHD-x1-f3         | CCATAGAGAGGCCAGCACAA      | RH-x1-R         | TTGATAGGATGCCACGAGCC        | 298       |
|     | KN1        | KNA-4708G-f3      | AACAGCTGTTGAGCTTG         | CR1-x37-r3      | ACTCTGTTCTCTGGTACTC         | 160       |
| 2   | N          | GYPA-N-72G-f4     | CAGCATCAAGTACCACTGGT      | GYPA-i2-r4      | AGGTGACTGCGTGGACATAG        | 756       |
|     | KEL4       | KEL4-841C-842G-f5 | CAATCTCCATCACTTCACG       | KEL-i9-r9       | TGATCTCCCAATCCCACCT         | 506       |
|     | JK2        | JK2-838A-f2       | AGTCTTTAGCCCATTTGcGA      | JK-i9-r1        | CTTTTTCTATCTCCCAACATCC      | 398       |
|     | D exon5    | RHD-i4-f1         | GCACCTCAGAGCAGGTTTC       | RHD-x5-r3       | TTCTCAGCAGAGCAGAGTTGAA      | 307       |
|     | KN3        | McCa-4795A-f3     | CCCCTCGGTGATTTCTACTAATA   | CR1-x37-r2      | CTATAGTACCTCACACC           | 166       |
| 3   | S          | GYPB-i2-f4        | CCTCAATCATCAAACAACATAGC   | GYPB-S-127T-r1  | CGATGGACAAGTTGTCCCA         | 729       |
|     | KEL7       | KEL-x15-f1        | CATTCTCCACCCTGGCTATC      | KEL7-r1         | GCATGGTTGTACAGGTGA          | 503       |
|     | DI1        | DI2-f1            | GTGGTGAAGTCCACGCT         | DI-i19-r2       | GGACTTGCTGCTTAGGGGTC        | 396       |
|     | D-psi      | RHD-psi-x4-f2     | ACTACCACATGAACCTACTGGG    | RHD-i4-r1       | CTTCAGACACCCAGGGGAAC        | 294       |
|     | KN4        | KN4-x29-f1        | GTTTGAGCTTGTGGGAGAACG     | KN4-4801A-r2    | AAACTCCTGTTCTCTGGTACaCT     | 153       |
| 4   | VEL        | VEL-f4            | CTGAGTGCCGAGATGCAAAG      | VEL-wt-r2       | TGCTGGACACAGCCCTAG          | 930       |
|     | s          | GYPB-i2-f4        | CCTCAATCATCAAACAACATAGC   | GYPB-s-127C-r1  | CGATGGACAAGTTGTCCCG         | 729       |
|     | KEL11      | KEL-i6-f          | TGCCCTCAACCTTAATCC        | KEL11-905T-r4   | GAGCTGGTCGATAGTGA           | 510       |
|     | DI3        | Di-i15-f1         | GAAGTATCTTTGGAGCCAGG      | DI3-1972A-r9    | CATCATCCAGATGGGAAGCTT       | 405       |
|     | C          | RH-C-F1           | GGAGGGGCCTATCTATTCAACG    | Rh-C-i2-r1      | CCACTGGGAAGTGACAAAGG        | 286       |
| 5   | Sc1        | Scianna-f2        | GGACCTCACTGCCTTGATCT      | Sc1-196G-r3     | ACCTCCTGGGTACCGTTCC         | 952       |
|     | Uvar       | GYPB-U-i5+5t-F    | TCGCCGACTGATAAAGGTGAT     | GYPB-i5-r6      | AAGAATTCATGGGTGGAAATTTGT    | 735       |
|     | K          | KEL-x5-f6         | TCTGGGGAGGAGAAAGCCTT      | KEL1-578T-r3    | ACTCATCAGAAGTCTCAGCA        | 501       |
|     | DI2        | DI1-f1            | GTGGTGAAGTCCACGCC         | DI-i19-r2       | GGACTTGCTGCTTAGGGGTC        | 396       |
|     | c          | RH-307C-f1        | CTTCTGAGCCAGTTCaCTC       | RHCE-i2-r1      | CCTGGATTCTTGATACgCA         | 276       |
|     | CO1        | CO1-134C-f4       | GAACAACCAGACGGC           | CO-x1-r3        | CGCACTGGGCGATGATGTA         | 188       |
| 6   | Sc2        | Scianna-f2        | GGACCTCACTGCCTTGATCT      | Sc2-196A-r3     | ACCTCCTGGGTACCGTTCT         | 952       |
|     | U          | GYPB-U-i5+5g-F5   | TCGCCGACTGATAAAGGTGAG     | GYPB-i5-r6      | AAGAATTCATGGGTGGAAATTTGT    | 735       |
|     | KEL3       | KEL3-841T-f4      | GTCAATCTCCATCACTTCAT      | KEL-i9-r9       | TGATCTCCCAATCCCACCT         | 508       |
|     | DI4        | Di-i15-f1         | GAAGTATCTTTGGAGCCAGG      | DI4-1972G-r5    | ATCATCCAGATGGGAACTC         | 405       |
|     | Cw         | RHCE-p-f2         | CATAGACAGGCCAGCACAG       | RHCw-x1-ir5     | TGCCACGAGCCCTTTC            | 287       |
|     | CO2        | CO2-134T-f3       | GGGAACAACCAGACGGT         | CO-x1-r3        | CGCACTGGGCGATGATGTA         | 190       |
| 7   | Lu1        | LU1-230A-f1       | CGGGAGCTCGCCCGCA          | LU-i4-r2        | CTCCAGCACCATCTCctGG         | 905       |
|     | Vw         | GYPA-i2-f1        | TCCGAAATCATTTTGTGATGT     | GYPA-Vw-r4      | GCATATGTGTCCCGTTGTACA       | 701       |
|     | KEL6       | KEL-x15-f1        | CATTCTCCACCCTGGCTATC      | KEL6-r1         | GCATGGTTGTACAGGTGG          | 503       |
|     | C4A(3567A) | C4A-x26-f2        | CAGGACCCCTGTCCAGTGT       | C4A-3567A-MM-r1 | GCTTTCTCCCCAAAAATGcGT       | 397       |
|     | E          | RH-E-676C-f2      | TGGCCAAGTGTCAACTCTC       | RHCE-x5-r2      | TGTGACCACCCAGCATTCTT        | 312       |
|     | In2        | IN2-137G-f3       | CGCTACAGCATCTCTCG         | IN-i2-r1        | CCATTCAGCTGTGGAAAGGAGC      | 209       |

continued on next page

**Table SI - MX3 Primer (continued from previous page)**

| Mix | Antigen    | Forward primer    | 5' - 3'                       | reverse primer  | 5' - 3'                  | size (bp) |
|-----|------------|-------------------|-------------------------------|-----------------|--------------------------|-----------|
| 8   | LU2        | LU2-230G-f1       | CGGGAGCTCGCCCGCG              | LU-i4-r2        | CTCCAGCACCATCCTCctGG     | 905       |
|     | FY1        | FYES-p-46T-f2     | TCATTAGTCCTTGGCTCTTAT         | FY1-125G-r1     | GCTGCTTCCAGGTTGGGAC      | 711       |
|     | KEL17      | KEL-i6-f          | TGCCCTCAACCCCTTAATCC          | KEL17-905C-r5   | AGCTGGTCGATAGTGG         | 510       |
|     | C4B(3567G) | C4B-x26-f2        | CCAGGACCTCTCTCCAGTGA          | C4B-3567G-MM-r1 | GCTTCTCCCCCAAAAATGcGC    | 398       |
|     | e          | RH-e-676G-f1      | TGGCCAAGTGCAACTCTG            | RHCE-x5-r2      | TGTGACCACCCAGCATTCTT     | 312       |
|     | In1        | IN1-137C-f2       | GTCGCTACAGCATCTCTCC           | IN-i2-r1        | CCATTACAGCTGTGGAAAGGAGC  | 211       |
| 9   | Lu8        | LU8-611T-f4       | TCTCTCCAGAGGGCTACAT           | LU-i7-r1        | TAGCAGGTCACAGAGGTCAG     | 922       |
|     | FY2        | FYES-p-46T-f2     | TCATTAGTCCTTGGCTCTTAT         | FY2-125A-r3     | AGCTGCTTCCAGGTTGGGAT     | 712       |
|     | C4A(3670C) | C4A-x26-f2        | CAGGACCCCTGTCCAGTGT           | C4A-3669TC-R    | TTGTTGTGGGCAACACCGA      | 496       |
|     | LW7        | LW2-299G-f3       | GGTTGGGTGTCTTACCG             | LW-x2-r1        | GGTTGGGTGTCTTACCG        | 398       |
|     | YT1        | YT1-1151(1)-s3    | CATCAACGCGGAGACTgCC           | YT-1409-as      | GAGCCAGAGAGATGAACAGTT    | 300       |
|     | DO1        | DO1-624T-f1       | ATTCGATTGGCCAATTCTT           | DO1-793A-r1     | TGACCTCAACTGCAACCAGTT    | 210       |
| 10  | Lu14       | LU14-230A-f2      | TCTCTCCAGAGGGCTACAA           | LU-i7-r1        | TAGCAGGTCACAGAGGTCAG     | 922       |
|     | FY mod     | FYX-265T-f5       | TCATGCTTTTCAGACCTCTcTCT       | FYX-R           | GTGGCCTGGTGGCAGAATAG     | 694       |
|     | C4B(3670G) | C4B-x26-f2        | CCAGGACCTCTCTCCAGTGA          | C4B3670G-R      | AGTTGTTGTGGGCAACatCC     | 499       |
|     | LW5        | LW5-299A-F        | CCGGGTTGGGTGTCTTATCA          | LW-x2-r1        | GGTTGGGTGTCTTACCG        | 401       |
|     | YT2        | YT2-1151(1)-s2    | TCATCAACGCGGAGACTACA          | YT-1409-as      | GAGCCAGAGAGATGAACAGTT    | 300       |
|     | DO2        | DO2-624C-f1       | ATTCGATTGGCCAATTCTC           | DO2-793G-r1     | GACCTCAACTGCAACCAGTC     | 209       |
| 11  | FY null    | FYES-(67C)-f1     | TCATTAGTCCTTGGCTCTCAC         | FYES-r1         | AGCTGCTTCCAGGTTGGC       | 711       |
|     | C4A(3258A) | C4-3258A-MM-f1    | TATGCGGCTTGGTTGTGACGAGA       | C4A-x26-r1      | TCCTGTCTAACACTGGACAGG    | 343       |
|     | Hy         | DO_Hy-f2          | CTTAGCCTGGCTTAACCATGG         | DO-Hy-x2-r      | GCTGATTGCTGAGGTGAGG      | 203       |
| 12  | Jra (706C) | Jra-706C-f3       | CTTAGGATGTCTAAGCAGGTAC        | Jra-i7-r1       | AGTGCTCATCAAGGCAGACC     | 591       |
|     | C4B(3258G) | C4-3258G-MM-ATAf1 | AATTAATATCGCGCTTGGTTGTCACGAGG | C4B-x26-ATA-r1  | AATTAATCCTATGTACTGGAGAGA | 355       |
|     | Joa        | DO-Joa-f1         | ATCGACTTCGACTTCGCACC          | DO_Joa-350C-r1  | AATAGCCACAGCGTGTGAGG     | 213       |

**Table SII - AKY Primer**

| Mix | Antigen | Forward primer | 5' - 3'                | Reverse primer | 5' - 3'                 | Size (bp) |
|-----|---------|----------------|------------------------|----------------|-------------------------|-----------|
| 1   | 1kb     | GH1-x2-f1      | CACCAGCTGGCCTTTGACAC   | GH1-x5-r1      | TGAAGCAGTAGAGCAGCCCG    | 993       |
|     | Aua     | Lu-i11-f1      | CCATGCTGTGCTCAGTTCT    | Lu18-1615A-r1  | CCACCTCAGTCACTCACCAGT   | 742       |
|     | KCAM    | KCAM-f3        | CTCAGTCATATCTTGTGAGCCA | KCAM-4843A-r4  | GGGCTGACATCTAAATCgGAT   | 322       |
|     | Yka+    | Yka-f2         | TCTGTGATCCACCTATCAGCTT | Yka-4223C-r3   | CTCAAAGTCATTAATTGGGAcCG | 160       |
| 2   | 1kb     | GH1-x2-f1      | CACCAGCTGGCCTTTGACAC   | GH1-x5-r1      | TGAAGCAGTAGAGCAGCCCG    | 993       |
|     | Aub     | Lu-i11-f1      | CCATGCTGTGCTCAGTTCT    | Lu19-1615G-r1  | CCACCTCAGTCACTCACCAGC   | 742       |
|     | KDAS    | KCAM-f3        | CTCAGTCATATCTTGTGAGCCA | KCAM-4843G-r4  | GGGCTGACATCTAAATCgGAC   | 322       |
|     | Yka-    | Yka-f2         | TCTGTGATCCACCTATCAGCTT | Yka-4223T-r1   | CTCAAAGTCATTAATTGGGAcCA | 160       |
